# Supplementary material for: A novel laminin β gene BmLanB1-w regulates wing-specific cell adhesion in silkworm, Bombyx mori
Source: PubMed Central journal article supplement (PMC4515764; doi:10.1038/srep12562), 2015-07-27
Supplement: srep12562-s1.pdf [file srep12562-s1.pdf]

## Supplementary information

### **A novel laminin $\beta$ gene *BmLanB1-w* regulates wing-specific cell adhesion in silkworm, *Bombyx mori***

Xiaoling Tong\*, Songzhen He\*, Jun Chen, Hai Hu, Zhonghuai Xiang, Cheng Lu and Fangyin Dai

State Key Laboratory of Silkworm Genome Biology, Key Laboratory for Sericulture Functional Genomics and Biotechnology of Agricultural Ministry, Southwest University, Chongqing, 400700, China

\*These authors contributed equally to this work.

#### **Corresponding authors:**

State Key Laboratory of Silkworm Genome Biology, Key Laboratory for Sericulture Functional Genomics and Biotechnology of Agricultural Ministry, Southwest University, No. 1 Tiansheng Rd., Beibei District, Chongqing, 400700, China.

E-mail: [fydai@swu.edu.cn](mailto:fydai@swu.edu.cn); [lucheng@swu.edu.cn](mailto:lucheng@swu.edu.cn)

**2 Supplementary Figures**

**2 Supplementary Tables**

## Supplementary Figure legends

**Figure S1 - Numbers of laminins in various species.** We identified laminin genes in *Caenorhabditis elegans*, *Bombyx mori*, *Plutella xylostella*, *Heliconius melpomene*, *Danaus plexippus*, *Tribolium castaneum*, and *Apis mellifera*. Numbers of laminins in *Homo sapiens*, *Mus musculus*, and *Drosophila melanogaster* are listed based on previous studies<sup>8, 26</sup>. Note that the numbers of laminins are different among the four lepidopterans. An extra  $\alpha$  chain is present in *P. xylostella* and an additional  $\beta$  chain is observed in silkworm.

**Figure S2 - Phylogenetic analysis of laminin  $\beta$  in various species.** Maximum likelihood tree was constructed based on the amino acid sequences of laminin  $\beta$ . Two distinct orthologous groups are observed in the tree representing insects and vertebrates, respectively. Abbreviations, Bm: *Bombyx mori*, Dm: *Drosophila melanogaster*, Am: *Apis mellifera*, Aa: *Aedes aegypti*, Tc: *Tribolium castaneum*, Hs: *Homo sapiens*, Dr: *Danio rerio*, Ce: *Caenorhabditis elegans*. Accession NO.s: HsLan $\beta$ 1 (NP\_002282.2), HsLan $\beta$ 2 (NP\_002283.3), HsLan $\beta$ 3 (NP\_000219.2), HsLan $\beta$ 4 (NP\_031382.2), DrLan $\beta$ 1a (NP\_775382.1), DrLan $\beta$ 1b (NP\_001264059.1), DrLan $\beta$ 2 (NP\_001229974.1), DrLan $\beta$ 2I (XP\_692838.6), DrLan $\beta$ 3 (XP\_700808.5), DrLan $\beta$ 4 (NP\_775383.1), AmLanB1 (XP\_001122457.2), TcLanB1 (XP\_008199694.1), DmLanB1 (NP\_476618.1), AaLanB1 (XP\_001657107.1), CeLanB1 (NP\_500734.2).

**Figure S1.**

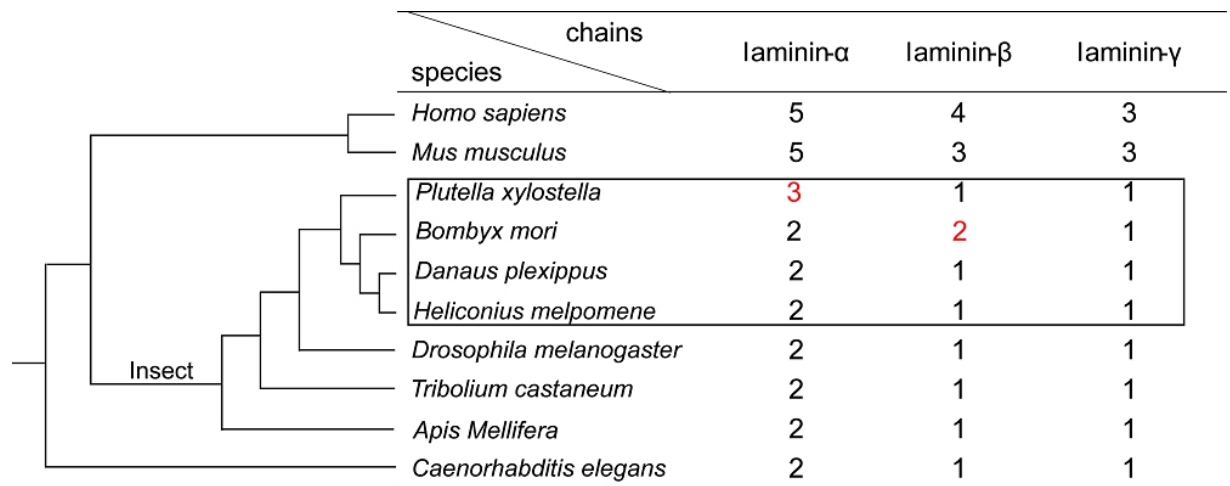

Figure S2.

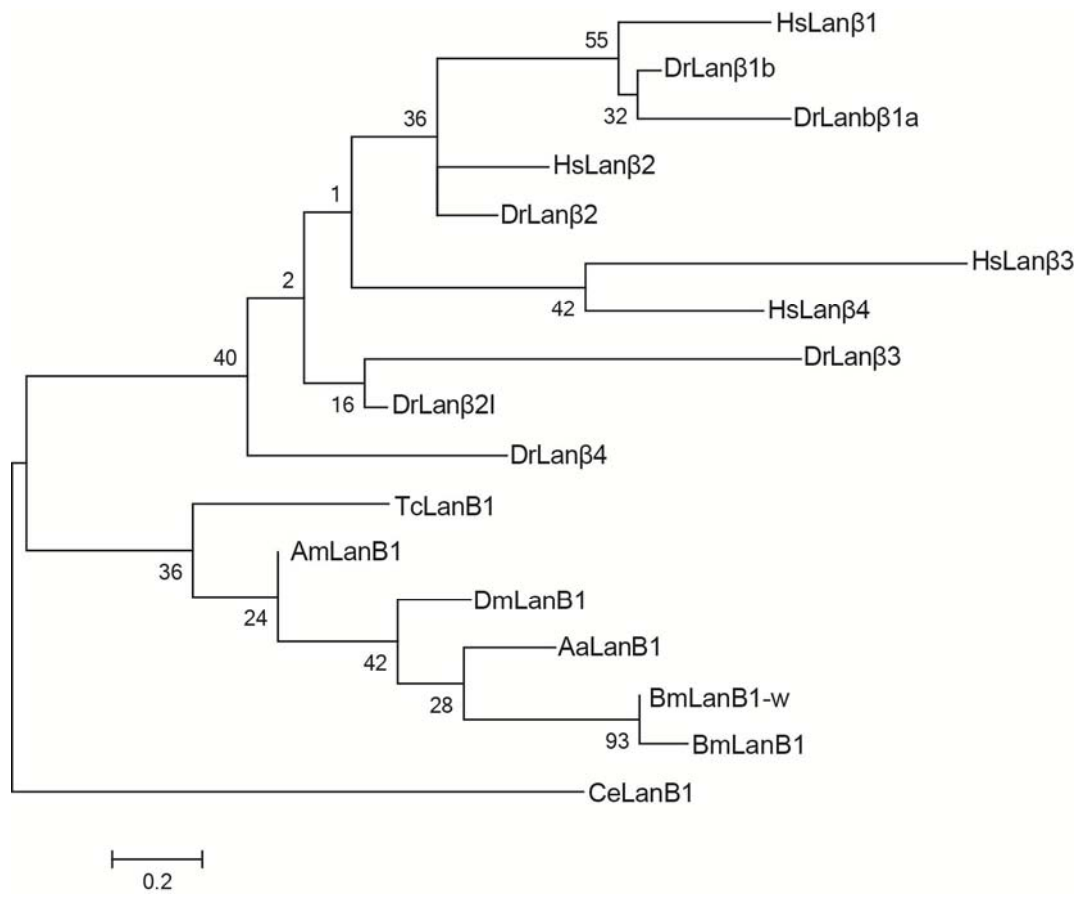

**Table S1** –The primers used in this work.

| <b>Object</b>              | <b>Name</b>                | <b>Sequence (5'–3')</b>      |                           |
|----------------------------|----------------------------|------------------------------|---------------------------|
| <b>Linkage analysis</b>    | S2213-F                    | GCCTTTATTAACGGATGCGGG        |                           |
|                            | S2213-R                    | AATGAGCGATTTAGTGGGCAA        |                           |
|                            | S1309-F                    | TTACAACTTTGAGATGCGATTTT      |                           |
|                            | S1309-R                    | GCAGATTTAATCGGCGTTCCC        |                           |
|                            | S1311-F                    | ACTACCCGTAGTTGTAATTTGATCTTTT |                           |
|                            | S1311-R                    | ACGTGTTTGGTTTGCTCGCT         |                           |
|                            | M1-F                       | CTCTAGCAAGAGCGGTGGTT         |                           |
|                            | M1-R                       | ACTCTGCCTTACCTTCTTCGT        |                           |
|                            | M2-F                       | CTCTGAAGACATTCCGCTAA         |                           |
|                            | M2-R                       | TACGACAATGACGCAAGG           |                           |
|                            | M000915-F                  | GTGCTGGCGTTGTGATTAG          |                           |
|                            | M000915-R                  | CCACTTCCTGGGCTGACT           |                           |
|                            | <b>primers for cloning</b> | 5'RACE-GSP                   | GTATCGGTAGGTCCGCCAGGTTTTT |
|                            |                            | 5'RACE-nestGSP               | GCAGAGTAGCGTTGGTAGAATCG   |
|                            |                            | 3'RACE-GSP                   | ACGAGGCTCAAGCAGCACAAGATG  |
| 3'RACE-nestGSP             |                            | ACAAATGTTGCTGGACCGTGCTAC     |                           |
| P1 -F                      |                            | AGAGACTACACCGCAGTATGAT       |                           |
| P1 -R                      |                            | AAAGCCCAAGCGAGGA             |                           |
| P2 -F                      |                            | GGGTGGGTCATTAGACCACG         |                           |
| P2 -R                      |                            | TGAGGAGATAATGAGCCTACGG       |                           |
| P3-F                       |                            | GAATACCGCTGGAGATAGTTG        |                           |
| P3-R                       |                            | GTGCCCGTTCCTTGA              |                           |
| P4-F                       |                            | CTTGAAGCCCTACGATTACGA        |                           |
| P4-R                       |                            | GCTACATACACAACATACATACGC     |                           |
| <b>Quantitative RT–PCR</b> |                            | BmLanB1-wQ-F                 | CGAGGCTCAAGCAGCACAAGA     |
|                            |                            | BmLanB1-wQ-R                 | CGGTAAATGCGAAAGTCGTAATC   |
|                            |                            | BGIBMGA002018Q-F             | CAACTGCGGCGGTGAGAC        |
|                            | BGIBMGA002018Q-R           | CCCATAAACGGCTGGTAGAAG        |                           |

---

BGIBMGA000910Q-F TGGAACTGGATGTGACCCTTG

BGIBMGA000910Q-R TTGTGTATGCTCCTGTGGCG

BGIBMGA002114Q-F CAATGAATCCAGGCTTCTCGC

BGIBMGA002114Q-R TCGGCTATCAAACGGTCCAG

BGIBMGA001218Q-F GGTATTCCCCGCTTTTCACG

BGIBMGA001218Q-R CAGGTGTGGGCTGGACATCTT

sw22934 -F TTCGTA CTGGCTCTTCTCGT

sw22934 -R CAAAGTTGATAGCAATTCCCT

**RNAi**

BmLanB1-wdsRNA1-F TAATACGACTCACTATAGGGAGAATCTGCCAGTAATAATGCCAATC

BmLanB1-wdsRNA1-R TAATACGACTCACTATAGGGAGAGCTTCGTAGCACGGTCCAG

BmLanB1-wdsRNA2-F TAATACGACTCACTATAGGGAGAAGCGGAACTCAAAGCAAGA

BmLanB1-wdsRNA2-R TAATACGACTCACTATAGGGAGACGAAAAACATTTAAGGGCAT

BmLanB1-wdsRNA3-F TAATACGACTCACTATAGGGAGAGTTGAAGCCCTACGATTACGA

BmLanB1-wdsRNA3-R TAATACGACTCACTATAGGGAGAGCACAATATCTGTAGTTCTCGGA

---

**Table S2** – Abbreviation table of proteins used in phylogenetic trees

| <b>Abbreviation</b> | <b>Species</b>                 | <b>Subunits</b>  | <b>Accession NO.</b> |
|---------------------|--------------------------------|------------------|----------------------|
| Dmwb                | <i>Drosophila melanogaster</i> | laminin $\alpha$ | AAD31714             |
| DmLanA              | <i>Drosophila melanogaster</i> | laminin $\alpha$ | AAF50672             |
| DmLanB1             | <i>Drosophila melanogaster</i> | laminin $\beta$  | AAF52563             |
| DmLanB2             | <i>Drosophila melanogaster</i> | laminin $\gamma$ | AAF50238             |
| AmLan $\alpha$ 1,2  | <i>Apis mellifera</i>          | laminin $\alpha$ | XP_006571726         |
| AmLanA              | <i>Apis mellifera</i>          | laminin $\alpha$ | XP_396118            |
| AmLanB1             | <i>Apis mellifera</i>          | laminin $\beta$  | XP_001122457         |
| AmLanB2             | <i>Apis mellifera</i>          | laminin $\gamma$ | XP_003249128         |
| AaLan $\alpha$ 1,2  | <i>Aedes aegypti</i>           | laminin $\alpha$ | XP_001653373         |
| AaLanA              | <i>Aedes aegypti</i>           | laminin $\alpha$ | XP_001659481         |
| AaLanB1             | <i>Aedes aegypti</i>           | laminin $\beta$  | XP_001657107         |
| AaLanB2             | <i>Aedes aegypti</i>           | laminin $\gamma$ | XP_001650503         |
| TcLan $\alpha$ 1,2  | <i>Tribolium castaneum</i>     | laminin $\alpha$ | XP_008194088         |
| TcLanA              | <i>Tribolium castaneum</i>     | laminin $\alpha$ | XP_972827            |
| TcLanB1             | <i>Tribolium castaneum</i>     | laminin $\beta$  | EFA11219             |
| TcLanB2             | <i>Tribolium castaneum</i>     | laminin $\gamma$ | XP_968632            |
| HsLan $\alpha$ 2    | <i>Homo sapiens</i>            | laminin $\alpha$ | XP_005267038         |
| HsLan $\alpha$ 3    | <i>Homo sapiens</i>            | laminin $\alpha$ | NP_001121189         |
| HsLanB1             | <i>Homo sapiens</i>            | laminin $\beta$  | AAA59482             |
| HsLanB2             | <i>Homo sapiens</i>            | laminin $\gamma$ | AAA59492             |
| CeLanA              | <i>Caenorhabditis elegans</i>  | laminin $\alpha$ | BAA32347             |
| CeLanB1             | <i>Caenorhabditis elegans</i>  | laminin $\beta$  | NP_500734            |
| CeLanB2             | <i>Caenorhabditis elegans</i>  | laminin $\gamma$ | NP_509204            |
